# Supplementary material for: Mapping of Quantitative Trait Loci Underlying Cold Tolerance in Rice Seedlings via High-Throughput Sequencing of Pooled Extremes
Source: PLoS One. 2013 Jul 30;8(7):e68433. doi: 10.1371/journal.pone.0068433 (PMC3728330; doi:10.1371/journal.pone.0068433)
Supplement: File S1 — Tables S1, S2, S3, S4, S5, S6. (XLS) [file pone.0068433.s001.xls]

## Sheet: Table S1
Table S1 Genes showing amino acid variations between the parents and significant responses to low temperature stress within the most probable interval of qCTSS-1
Gene	Regulated by cold	SNP number causing aa variation	Start position	End position	Annotation
LOC_Os01g52380	down	4	30091365	30093186	expressed protein,protein binding,response to stress
LOC_Os01g52450	down	8	30131348	30135287	hexokinase,putative,expressed,cellular homeostasis,signal transduction,membrane,nucleotide binding,protein binding,binding,mitochondrion,nucleus,carbohydrate metabolic process,cellular process,kinase activity,vacuole,catabolic process,cell death,plastid
LOC_Os01g52500	up	2	30166017	30171659	NADP-dependent malic enzyme,putative,expressed,cellular component organization,post-embryonic development,catalytic activity,metabolic process,protein binding,binding,cellular process,biosynthetic process,lipid metabolic process,reproduction,embryo development,plastid
LOC_Os01g52530	up	4	30180581	30184477	phosphoribosyl transferase,putative,expressed,binding,transferase activity,nucleobase,nucleoside,nucleotide and nucleic acid metabolic process,biosynthetic process
LOC_Os01g52640	up	4	30257752	30263989	suppressor of phythchrome A,putative,expressed,intracellular,signal transduction,protein binding,plasma membrane,protein modification process,signal transducer activity
LOC_Os01g52864	up	2	30398944	30405920	transmembrane protein,putative,expressed,plastid,membrane
LOC_Os01g53250	down	2	30593434	30598522	NADPH reductase,putative,expressed,cellular_component,nucleotide binding,metabolic process,catalytic activity
LOC_Os01g53294	up	4	30622671	30634405	respiratory burst oxidase protein B,putative,expressed,catalytic activity,response to endogenous stimulus,signal transduction,cell death,metabolic process,cellular process,response to stress,plasma membrane,biosynthetic process
LOC_Os01g53520	up	12	30738697	30740729	reticulon domain containing protein,putative,expressed,endoplasmic reticulum,membrane,biological_process,plasma membrane,vacuole
LOC_Os01g53840	up	4	30949378	30954738	protein kinase family protein,putative,expressed,cell,metabolic process,cellular process,catabolic process,kinase activity,protein modification process
LOC_Os01g53900	up	9	30992411	30997182	elongation factor,putative,expressed,membrane,translation factor activity,nucleic acid binding,cellular_component,response to stress,response to abiotic stimulus,translation,vacuole,nucleolus,cytosol,binding,plasma membrane,plastid
LOC_Os01g54010	down	2	31065121	31070148	peptidase,putative,expressed,protein metabolic process,hydrolase activity,vacuole
LOC_Os01g54040	down and up	2	31078609	31088007	ATP-dependent protease La,putative,expressed,cellular_component,protein metabolic process,biosynthetic process,protein modification process,catabolic process,nucleobase,nucleoside,nucleotide and nucleic acid metabolic process,hydrolase activity
LOC_Os01g54060	down	2	31096588	31097195	expressed protein
LOC_Os01g54070	down	2	31097509	31097829	expressed protein
LOC_Os01g54100	down	2	31111291	31116151	CK1_CaseinKinase_1a.2 - CK1 includes the casein kinase 1 kinases,expressed,metabolic process,cellular process,kinase activity,nucleotide binding,protein modification process
LOC_Os01g54350	up	2	31275097	31279534	protein kinase domain containing protein,expressed,metabolic process,cellular process,kinase activity,cytosol,protein modification process,plasma membrane
LOC_Os01g55200	down	2	31761223	31763887	potassium channel KAT1,putative,expressed,transport,nucleotide binding,protein binding,transporter activity,cellular process,plasma membrane
LOC_Os01g55270	down	2	31811345	31814593	SGS domain containing protein,expressed,molecular_function,biological_process,plasma membrane
LOC_Os01g55500	down	3	31975992	31980079	nucleobase-ascorbate transporter,putative,expressed,transport,membrane,cellular process,transporter activity
LOC_Os01g55580	up	4	32016622	32022401	tesmin/TSO1-like CXC domain containing protein,expressed,biosynthetic process,nucleobase,nucleoside,nucleotide and nucleic acid metabolic process,sequence-specific DNA binding transcription factor activity
LOC_Os01g55780	down	2	32130586	32137004	glycerophosphoryl diester phosphodiesterase family protein,putative,expressed,cell,carbohydrate metabolic process,cellular process,hydrolase activity,lipid metabolic process
LOC_Os01g55799	down	6	32137366	32143435	exo70 exocyst complex subunit domain containing protein,expressed,cytoplasm,cytosol,transport,cellular process,plasma membrane
LOC_Os01g56100	down	2	32298855	32303035	BSD domain containing protein,expressed,molecular_function,cellular_component,biological_process
LOC_Os01g56190	up	4	32350513	32360765	HVT1,putative,expressed
LOC_Os01g56200	up	2	32367683	32371816	BTBA2 - Bric-a-Brac,Tramtrack,Broad Complex BTB domain with Ankyrin repeat region,expressed,response to stress,response to biotic stimulus,protein binding,nucleus,signal transduction,response to endogenous stimulus
LOC_Os01g56260	up	8	32396631	32400156	expressed protein
LOC_Os01g56580	up	2	32615694	32622894	CK1_CaseinKinase_1a.3 - CK1 includes the casein kinase 1 kinases,expressed,cellular_component,metabolic process,cellular process,kinase activity,nucleotide binding,protein modification process
LOC_Os01g56600	up	2	32652482	32656601	signal recognition particle 54 kDa protein,putative,expressed,RNA binding,metabolic process,cytoplasm,transport,cellular process,cytosol,nucleotide binding,hydrolase activity,cellular component organization
LOC_Os01g56780	up	4	32759124	32764841	plus-3 domain containing protein,expressed,DNA binding,nucleus,biosynthetic process,nucleobase,nucleoside,nucleotide and nucleic acid metabolic process,binding,growth,nucleic acid binding
LOC_Os01g56870	down	6	32842662	32847884	expressed protein
LOC_Os01g57210	down	2	33050635	33058497	katanin p80 WD40 repeat-containing subunit B1 homolog 1,putative,expressed,intracellular,nucleotide binding,plasma membrane,response to stress,response to abiotic stimulus,response to endogenous stimulus,plasma membran
LOC_Os01g57280	up	87	33098072	33104550	rp1,putative,expressed,protein binding,response to stress
LOC_Os01g57340	down	6	33141127	33145609	rp1,putative,expressed,protein binding,response to stress
LOC_Os01g57380	down	2	33174311	33174811	hypothetical protein
Note:
1. The microarray data were from Yun et al. BMC Plant Biology 2010, 10:16; http://www.ncbi.nlm.nih.gov/geo/query/acc.cgi?acc=GSE8767.
2. The microarray experiments included 10 time points (0.5, 2, 4, 6, 12, 18, 24, 36, 48, 96 hrs) after exposed to low temperature stress.
3. The microarray data were reanalyzed with LIMMA (P<0.05,) using an arbitrary threshold of |logFC| (|log2-fold change|) ≥ 2.
4. A gene was considered to be differentially expressed when its expression intensity was significantly changed at least at one time point investigated.
5. Most of the differentially expressed genes showed consistent regulation direction throughout the time span investigated.

## Sheet: Table S2
Table S2 Genes showing amino acid variations between the parents and significant responses to low temperature stress within the most probable interval of qCTSS-2a
Gene	Regulated by cold	SNP number causing aa variation	Start position	End position	Annotation
LOC_Os02g17920	up	1	10378455	10380939	glyoxalase family protein,putative,expressed,catalytic activity,metabolic process,response to stress,response to abiotic stimulus,thylakoid,binding,carbohydrate metabolic process,plastid
LOC_Os02g18000	up	26	10444560	10450976	disease resistance protein RGA2,putative,expressed,protein binding,response to stress
LOC_Os02g18080	up	52	10503049	10508541	NB-ARC domain containing protein,expressed,protein binding,response to stress
LOC_Os02g19170	down	6	11180083	11182664	expressed protein,molecular_function,biological_process
LOC_Os02g19210	down	1	11199425	11205881	WD repeat-containing protein,putative,expressed,nucleotide binding
LOC_Os02g19420	down	4	11339959	11346778	expressed protein,molecular_function,multicellular organismal development
LOC_Os02g19510	down	2	11399635	11404047	lysine ketoglutarate reductase trans-splicing related 1,putative,expressed,molecular_function,biological_process
LOC_Os02g19550	down	3	11427544	11429904	lectin-like receptor kinase,putative,expressed,cell,metabolic process,cellular process,multicellular organismal development,kinase activity,protein modification process
LOC_Os02g20140	up	2	11862413	11869640	protein kinase domain containing protein,expressed,metabolic process,cellular process,kinase activity,nucleotide binding,biosynthetic process,protein modification process,plasma membrane
LOC_Os02g20410	down	1	12023805	12034641	GTP binding protein,putative,expressed,nucleolus,catabolic process,nucleobase,nucleoside,nucleotide and nucleic acid metabolic process,biological_process,nucleotide binding,hydrolase activity,plastid
LOC_Os02g20620	down	2	12153845	12154630	speckle-type POZ protein,putative,expressed,protein binding,response to stress,response to abiotic stimulus,cytosol,cellular process,response to extracellular stimulus,cell communication
LOC_Os02g20870	down	2	12339729	12348529	SNI1,putative,expressed,biosynthetic process,nucleobase,nucleoside,nucleotide and nucleic acid metabolic process,nucleus,response to stress,response to biotic stimulus,DNA metabolic process,DNA binding,cellular component organization,protein modification process
LOC_Os02g20970	up	5	12398421	12404925	C2 domain containing protein,putative,expressed,plastid
LOC_Os02g21410	down	2	12712141	12714195	hypothetical protein
LOC_Os02g21430	down	2	12720883	12729014	AML1,putative,expressed,RNA binding,nucleus,nucleotide binding,biological_process,nucleic acid binding
LOC_Os02g21520	up	8	12765282	12772122	chalcone isomerase 3,putative,expressed,catalytic activity,biosynthetic process,cellular process,secondary metabolic process,plastid
LOC_Os02g21540	down	42	12780487	12782731	expressed protein
LOC_Os02g22090	down	1	13144846	13149939	pattern formation protein EMB30,putative,expressed,enzyme regulator activity,cytoplasm,cell cycle,transporter activity,transport,cellular process,embryo development,biological_process,cellular component organization,anatomical structure morphogenesis,cell growth,post-embryonic development,protein binding,metabolic process,cell differentiation,multicellular organismal development,reproduction
LOC_Os02g22110	down	1	13164484	13164765	expressed protein
LOC_Os02g22120	up	1	13169863	13171849	expressed protein
Note:
See Suppl. Table 1

## Sheet: Table S3
Table S3 Genes showing amino acid variations between the parents and significant responses to low temperature stress within the most probable interval of qCTSS-2b
Gene	Regulated by cold	SNP number causing aa variation	Start position	End position	Annotation
LOC_Os02g24340	up	2	14121103	14123910	1-acyl-sn-glycerol-3-phosphate acyltransferase theta,putative,expressed,membrane,endoplasmic reticulum,metabolic process,transferase activity,biosynthetic process,cellular process,lipid metabolic process,plasma membrane
LOC_Os02g24750	up	4	14357143	14361861	expressed protein
LOC_Os02g25310	up	17	14761555	14763798	zinc knuckle family protein,expressed
LOC_Os02g26400	down	1	15502499	15507276	nuclease,EndA/NucM family protein,expressed
LOC_Os02g26660	down	2	15650237	15655574	exonuclease,putative,expressed,cell,nuclease activity,metabolic process,intracellular,biological_process,nucleic acid binding
LOC_Os02g26860	up	2	15770441	15775349	START domain containing protein,putative,expressed,molecular_function,cellular_component,biological_process
LOC_Os02g27000	up	3	15865332	15876489	ATP-binding region,ATPase-like domain containing protein,expressed,membrane,nucleotide binding
LOC_Os02g27400	up	1	16150035	16152929	OsFBX49 - F-box domain containing protein,expressed,molecular_function,biological_process
LOC_Os02g27480	down	1	16259550	16263496	membrane attack complex component/perforin/complement C9,putative,expressed,molecular_function,cellular_component,biological_process
LOC_Os02g27540	up	11	16311925	16315043	NB-ARC domain containing protein,expressed,cellular_component,nucleotide binding,response to stress
LOC_Os02g27550	down	2	16320084	16320377	hypothetical protein
LOC_Os02g27710	down	7	16412907	16415662	disease resistance protein,putative,expressed,response to stress,cell death,protein binding,nucleotide binding,plasma membrane
LOC_Os02g27820	down	2	16470482	16476721	expressed protein,membrane,vacuole,protein binding,binding,biological_process
LOC_Os02g28074	up	6	16617378	16633889	XRN 5-3 exonuclease N-terminus family protein,expressed,nucleobase,nucleoside,nucleotide and nucleic acid metabolic process,catabolic process,regulation of gene expression,epigenetic,cellular component organization,anatomical structure morphogenesis,cell growth,nucleus,response to endogenous stimulus,signal transduction,metabolic process,nuclease activity,nucleic acid binding,response to abiotic …
LOC_Os02g28530	down	3	16881441	16883694	expressed protein,cytoskeleton,cellular component organization,cellular process,cytoplasm
LOC_Os02g29040	down	1	17196088	17204631	ankyrin repeat domain containing protein,putative,expressed,cellular_component,biological_process,binding
LOC_Os02g29070	up	1	17217534	17218463	protein kinase domain containing protein,expressed,metabolic process,cellular process,kinase activity,nucleotide binding,protein modification process
LOC_Os02g29130	up	1	17245021	17254879	ankyrin,putative,expressed,cellular_component,biological_process,binding
LOC_Os02g29220	down	1	17337595	17342087	expressed protein,molecular_function,cellular_component,biological_process
LOC_Os02g29380	down	1	17446354	17455159	expressed protein,regulation of gene expression,epigenetic,biosynthetic process,nucleobase,nucleoside,nucleotide and nucleic acid metabolic process,catalytic activity,nucleus,metabolic process,response to stress,DNA metabolic process,protein binding,hydrolase activity
LOC_Os02g29464	up	1	17489974	17507786	RecF/RecN/SMC N terminal domain containing protein,expressed,nucleus,metabolic process,response to stress,DNA metabolic process,nucleotide binding,cytoplasm,nuclease activity,cellular component organization,binding
LOC_Os02g30110	down	1	17880886	17886427	cytochrome P450,putative,expressed,molecular_function,binding,catalytic activity,metabolic process,oxygen binding
LOC_Os02g30620	down	3	18227411	18230654	dnaJ domain containing protein,expressed,protein metabolic process,cellular process,protein binding
LOC_Os02g30630	up	2	18236025	18238376	thiamine pyrophosphate enzyme,C-terminal TPP binding domain containing protein,expressed,catalytic activity,metabolic process,biosynthetic process,cellular process,transferase activity,plastid
LOC_Os02g30930	down	3	18474494	18476089	expressed protein
LOC_Os02g31040	down	9	18546692	18552235	dihydrolipoyllysine-residue succinyltransferase component of 2-oxoglutarate dehydrogenase complex,mitochondrial precursor,putative,expressed,response to stress,metabolic process,transferase activity,binding,mitochondrion,ribosome,cytosol
LOC_Os02g32520	up	1	19251345	19256303	ERD1 protein,chloroplast precursor,putative,expressed,metabolic process,nucleotide binding,cellular component organization,protein binding,catabolic process,nucleobase,nucleoside,nucleotide and nucleic acid metabolic process,plastid,hydrolase activity
Note:
See Suppl. Table 1

## Sheet: Table S4
Table S4 Genes showing amino acid variations between the parents and significant responses to low temperature stress within the most probable interval of qCTSS-5
Gene	Regulated by cold	SNP number causing aa variation	Start position	End position	Annotation
LOC_Os05g43770	down	3	25446886	25452570	NLI interacting factor-like phosphatase,putative,expressed,molecular_function,membrane,mitochondrion,reproduction,post-embryonic development,embryo development
LOC_Os05g43840	up	1	25489315	25491603	CAMK_KIN1/SNF1/Nim1_like.25 - CAMK includes calcium/calmodulin depedent protein kinases,expressed,metabolic process,cellular process,signal transduction,nucleotide binding,kinase activity,protein modification process,protein binding
LOC_Os05g43920	down	3	25555850	25561791	auxin response factor 14,putative,expressed,response to endogenous stimulus,DNA binding,nucleus,biosynthetic process,nucleobase,nucleoside,nucleotide and nucleic acid metabolic process,cell differentiation,sequence-specific DNA binding transcription factor activity,post-embryonic development,metabolic process,cellular process
LOC_Os05g43930	up	1	25564508	25566228	O-methyltransferase,putative,expressed,transferase activity,cytosol,metabolic process,cellular process,protein binding
LOC_Os05g44050	down	1	25620551	25623352	ras-related protein,putative,expressed,nucleus,signal transduction,nucleotide binding,transport,plasma membrane
LOC_Os05g44080	up	1	25628803	25635033	transmembrane protein,putative,expressed,biological_process
LOC_Os05g44180	up	1	25667455	25669369	osFTL10 FT-Like10 homologous to Flowering Locus T gene; contains Pfam profile PF01161: Phosphatidylethanolamine-binding protein,expressed,nucleus,flower development,cytoplasm,reproduction,post-embryonic development,response to abiotic stimulus,protein binding,lipid binding,cellular process
LOC_Os05g44310	up	2	25781735	25788582	vesicle-fusing ATPase,putative,expressed,protein binding,cellular_component,vacuole
LOC_Os05g44330	down	2	25796297	25800798	DJ-1 family protein,putative,expressed,biological_process,plastid
LOC_Os05g44590	down	3	25942431	25947920	ATP-dependent protease La,putative,expressed,cellular_component,protein metabolic process,biosynthetic process,protein modification process,catabolic process,nucleobase,nucleoside,nucleotide and nucleic acid metabolic process,hydrolase activity
LOC_Os05g44760	up	1	26017295	26022937	hexokinase,putative,expressed,cellular homeostasis,signal transduction,membrane,nucleotide binding,protein binding,binding,mitochondrion,nucleus,carbohydrate metabolic process,cellular process,kinase activity,vacuole,catabolic process,cell death,plastid
LOC_Os05g44792	down	1	26042952	26049426	expressed protein,DNA binding,nucleus,biosynthetic process,DNA metabolic process,binding,nucleic acid binding
LOC_Os05g44800	down	2	26049874	26050504	expressed protein
LOC_Os05g44910	down	1	26095991	26099212	dual specificity protein phosphatase,putative,expressed,protein modification process,hydrolase activity,carbohydrate metabolic process,cellular process,catabolic process,metabolic process
LOC_Os05g44930	up	3	26113277	26118011	receptor-like protein kinase,putative,expressed,cell,metabolic process,cellular process,kinase activity,protein modification process,response to stress,response to biotic stimulus
LOC_Os05g44940	down	7	26120363	26126935	protein kinase domain containing protein,expressed,cell,metabolic process,cellular process,biosynthetic process,protein modification process,kinase activity
LOC_Os05g45030	down	1	26175527	26177067	calcium homeostasis regulator CHoR1,putative,expressed,molecular_function,nucleus,mitochondrion,biological_process,plastid
LOC_Os05g45050	down	10	26180088	26182354	reticulon domain containing protein,putative,expressed,endoplasmic reticulum,membrane,biological_process,plasma membrane,vacuole,cellular_component
LOC_Os05g45100	up	1	26198395	26200034	anthocyanidin 5,3-O-glucosyltransferase,putative,expressed,transferase activity,metabolic process,cytosol
LOC_Os05g46000	down	1	26664617	26666561	ras-related protein,putative,expressed,biological_process,cell differentiation,cell death,nucleotide binding,catabolic process,cellular process,vacuole
LOC_Os05g46030	down	5	26685979	26704758	myosin head family protein,expressed,cellular process,reproduction,metabolic process,cellular_component,anatomical structure morphogenesis,cellular component organization,cell differentiation,multicellular organismal development,motor activity,cell growth,post-embryonic development,cytoskeleton
LOC_Os05g46270	down	1	26830170	26834200	FEN1A - Putative flap endonuclease protein,expressed,DNA binding,nuclease activity,response to stress,DNA metabolic process,cytosol,catalytic activity
LOC_Os05g46440	up	1	26907205	26907602	expressed protein
LOC_Os05g46560	up	1	26958508	26961504	RAN GTPase-activating protein 1,putative,expressed,endoplasmic reticulum,nuclear envelope,enzyme regulator activity,membrane,vacuole,transport,cellular process,response to stress,response to abiotic stimulus,signal transduction,nucleobase,nucleoside,nucleotide and nucleic acid metabolic process,catabolic process,plastid
LOC_Os05g46690	up	1	27024974	27027115	expressed protein,molecular_function,biological_process,plasma membrane
LOC_Os05g47500	up	4	27211913	27217567	MDR-like ABC transporter,putative,expressed,transport,cellular process,cellular_component,hydrolase activity,transporter activity,catabolic process,nucleobase,nucleoside,nucleotide and nucleic acid metabolic process,plasma membrane
LOC_Os05g47820	down	1	27413101	27414368	expressed protein,molecular_function,biological_process
LOC_Os05g47850	up	2	27440760	27445952	chloroplastic group IIA intron splicing facilitator CRS1,chloroplast precursor,putative,expressed,RNA binding,reproduction,post-embryonic development,embryo development,response to endogenous stimulus,plastid
LOC_Os05g47900	down	2	27463147	27465297	protein binding protein,putative,expressed,binding
LOC_Os05g47930	up	1	27474045	27479064	OsQSOXL1 quiescin-sulfhydryl oxidase-like OsQSOXL1,expressed,cell wall,binding,metabolic process,response to stress,response to abiotic stimulus,catalytic activity,transport,Golgi apparatus,cellular homeostasis
LOC_Os05g47970	down	3	27504934	27509339	microtubule associated protein,putative,expressed,cytoskeleton,cytoplasm,cell cycle,cellular component organization,cellular process,behavior,anatomical structure morphogenesis,response to biotic stimulus,protein binding
LOC_Os05g48230	down	1	27643114	27647843	expressed protein,molecular_function,cellular_component,biological_process
LOC_Os05g48340	down	1	27712350	27717899	proteasome-related,putative,expressed,membrane,vacuole,cellular_component,biological_process,binding
LOC_Os05g48450	down	1	27778783	27784832	aminotransferase domain containing protein,putative,expressed,transferase activity,metabolic process,cellular process,catalytic activity,mitochondrion,plastid
LOC_Os05g48500	down	2	27793442	27798381	expressed protein,biosynthetic process,nucleobase,nucleoside,nucleotide and nucleic acid metabolic process,nucleus,response to endogenous stimulus,signal transduction,protein binding
LOC_Os05g48660	up	2	27886608	27889511	MRH1,putative,expressed,signal transduction,anatomical structure morphogenesis,cell differentiation,multicellular organismal development,kinase activity,nucleotide binding,protein modification process
LOC_Os05g48750	up	1	27936127	27939345	3-deoxy-manno-octulosonate cytidylyltransferase,putative,expressed,biosynthetic process,carbohydrate metabolic process,cellular process,lipid metabolic process,transferase activity,metabolic process,mitochondrion
LOC_Os05g48790	up	7	27957805	27961068	expressed protein
LOC_Os05g48800	up	1	27967561	27971088	drought induced 19 protein,putative,expressed,response to stress,response to abiotic stimulus,protein binding
LOC_Os05g48880	up	1	28040183	28042695	expressed protein,anatomical structure morphogenesis,multicellular organismal development,growth,protein modification process,nucleus,metabolic process,cell cycle,signal transduction,response to endogenous stimulus,protein binding,DNA metabolic process,biosynthetic process,cellular process,catalytic activity
LOC_Os05g49130	down	2	28183127	28188697	16S rRNA processing protein RimM containing protein,expressed,binding,cellular process,metabolic process,transferase activity,nucleobase,nucleoside,nucleotide and nucleic acid metabolic process,plastid
LOC_Os05g49220	up	1	28242004	28244772	GTP-binding protein,putative,expressed,RNA binding,nucleotide binding,plastid
LOC_Os05g49260	up	1	28258435	28262171	transporter family protein,putative,expressed,transport,membrane,cellular process,transporter activity,vacuole
LOC_Os05g49390	down	1	28320165	28325897	expressed protein
LOC_Os05g50170	up	1	28745289	28751809	ATPCME,putative,expressed,membrane,hydrolase activity,metabolic process,endoplasmic reticulum,cell-cell signaling,Golgi apparatus
LOC_Os05g50200	down	2	28767046	28774104	expressed protein,molecular_function,cellular_component,biosynthetic process,protein modification process
LOC_Os05g51630	up	3	29608182	29616433	early-responsive to dehydration protein-related,putative,expressed,plasma membrane
Note:
See Suppl. Table 1

## Sheet: Table S5
Table S5 Genes showing amino acid variations between the parents and significant responses to low temperature stress within the most probable interval of qCTSS-8
Gene	Regulated by cold	SNP number causing aa variation	Start position	End position	Annotation
LOC_Os08g33860	down	4	21194859	21200130	zinc finger,C3HC4 type,putative,expressed,nucleus,binding,cytoplasm
LOC_Os08g34070	up	1	21355383	21360738	DCN1,putative,expressed,biological_process
LOC_Os08g34180	up	2	21424847	21429669	expressed protein
LOC_Os08g34520	up	2	21665545	21665821	hypothetical protein
LOC_Os08g34640	down and up	7	21756526	21762152	receptor-like protein kinase precursor,putative,expressed,response to stress,signal transduction,nucleotide binding,cellular_component,kinase activity,protein modification process,response to endogenous stimulus,protein binding,receptor activity,binding,signal transducer activity,biological_process,plasma membrane,catalytic activity
LOC_Os08g34760	down	3	21848889	21856111	expressed protein,molecular_function,cellular_component,biological_process
LOC_Os08g34840	down	1	21916764	21917907	expressed protein
LOC_Os08g34890	down	3	21967413	21969768	OsFBDUF46 - F-box and DUF domain containing protein,expressed,molecular_function,cellular_component,biological_process
LOC_Os08g34950	up	2	22001127	22011881	chaperonin Cpn60/TCP-1,putative,expressed,kinase activity,cellular component organization,cellular process,multicellular organismal development,signal transduction,lipid binding,lipid metabolic process,endosome,binding,mitochondrion
LOC_Os08g35000	down	2	22038850	22048677	ARID/BRIGHT DNA-binding domain containing protein,expressed,DNA binding,binding,intracellular
LOC_Os08g35190	down	1	22190136	22191839	auxin-repressed protein,putative,expressed,molecular_function,biological_process,cellular_component
LOC_Os08g35630	up	2	22462394	22464896	MTD1,putative,expressed,molecular_function,protein binding,biological_process
LOC_Os08g35650	up	6	22475056	22479169	expressed protein
LOC_Os08g36680	up	1	23147217	23151318	bifunctional monodehydroascorbate reductase and carbonic anhydrasenectarin-3 precursor,putative,expressed,cell,metabolic process,cellular process,binding,catalytic activity
LOC_Os08g36774	up	2	23219045	23231059	zinc finger family protein,putative,expressed,cellular_component,binding,biological_process
LOC_Os08g37020	down	1	23404580	23406926	expressed protein
LOC_Os08g37160	down and up	13	23478068	23480708	expressed protein
LOC_Os08g37210	up	5	23502943	23505310	patatin,putative,expressed,response to stress,cellular process,membrane,response to biotic stimulus,cell death,cytoplasm,biological_process,molecular_function,hydrolase activity,biosynthetic process,lipid metabolic process
LOC_Os08g37260	up	2	23551865	23556346	expressed protein
LOC_Os08g37350	down	1	23593692	23601132	ubiquitin carboxyl-terminal hydrolase family protein,expressed,hydrolase activity,metabolic process,multicellular organismal development,flower development,biological_process,binding
LOC_Os08g38200	up	1	24204442	24210500	phosphatidylinositol 3- and 4-kinase family protein,putative,expressed,cellular_component,metabolic process,cellular process,transferase activity,kinase activity
LOC_Os08g38990	down	3	24645880	24649829	WRKY30,expressed,cellular process,biosynthetic process,nucleobase,nucleoside,nucleotide and nucleic acid metabolic process,reproduction,post-embryonic development,embryo development,sequence-specific DNA binding transcription factor activity
LOC_Os08g39040	down	4	24669314	24671276	expressed protein,cellular_component,hydrolase activity,protein metabolic process,metabolic process
LOC_Os08g39170	up	17	24734910	24738361	expressed protein,response to stress,response to biotic stimulus,metabolic process,cellular process,kinase activity,signal transduction,vacuole,biological_process,cell wall,protein binding,plasma membrane
LOC_Os08g39220	up	7	24772961	24775745	OsWAK75 - OsWAK receptor-like protein kinase,expressed,cell,metabolic process,cellular process,response to biotic stimulus,cell wall,kinase activity,membrane
LOC_Os08g39230	down	2	24776822	24778619	expressed protein
LOC_Os08g39240	up	20	24780310	24786090	OsWAK76 - OsWAK receptor-like cytoplasmic kinase OsWAK-RLCK,expressed,kinase activity,protein binding,protein modification process,plasma membrane
LOC_Os08g39360	down	1	24878745	24879853	expressed protein
LOC_Os08g39400	down	1	24914636	24915049	expressed protein
Note:
See Suppl. Table 1

## Sheet: Table S6
Table S6 Genes showing amino acid variations between the parents and significant responses to low temperature stress within the most probable interval of qCTSS-10
Gene	Regulated by cold	SNP number causing aa variation	Start position	End position	Annotation
LOC_Os10g29810	up	2	15498122	15499315	MBTB58 - Bric-a-Brac,Tramtrack,Broad Complex BTB domain with Meprin and TRAF Homology MATH domain,expressed,nucleus,protein binding,response to stress,response to abiotic stimulus,cellular process,response to extracellular stimulus,cell communication
LOC_Os10g29820	up	1	15500253	15501197	snRNP protein,putative,nucleus,protein binding,response to stress,response to abiotic stimulus,cellular process,response to extracellular stimulus,cell communication
LOC_Os10g30054	up	1	15601067	15610594	ENT domain containing protein,expressed,molecular_function,biological_process
LOC_Os10g30190	up	3	15689665	15693104	BTBP2 - Bric-a-Brac,Tramtrack,Broad Complex BTB domain with pentapeptide repeats,expressed,membrane,transport,transporter activity,protein binding,cellular process,plasma membrane
LOC_Os10g30360	down	1	15774570	15775465	MATH domain containing protein,nucleus,protein binding,response to stress,response to abiotic stimulus,cytosol,cellular process
LOC_Os10g30590	up	3	15918243	15923350	pentatricopeptide,putative,expressed
LOC_Os10g31030	down	2	16201250	16208251	EMB1691,putative,expressed,transferase activity,cytosol,metabolic process,cellular process,reproduction,post-embryonic development,embryo development,nucleic acid binding
LOC_Os10g31710	down	1	16621128	16621703	glycine-rich cell wall structural protein 2 precursor,putative,expressed
LOC_Os10g31770	up	3	16651740	16660551	START domain containing protein,expressed,lipid binding,biological_process,plasma membrane
LOC_Os10g31850	down and up	1	16704943	16708495	RING finger and CHY zinc finger domain-containing protein 1,putative,expressed,binding
LOC_Os10g31970	down	7	16787617	16801116	SNF2 family N-terminal domain containing protein,expressed
LOC_Os10g32910	down	1	17226547	17227017	expressed protein
LOC_Os10g33080	up	45	17331234	17335410	leucine-rich repeat receptor protein kinase EXS precursor,putative,expressed,cell,signal transduction,kinase activity,nucleotide binding,protein modification process
LOC_Os10g33130	up	7	17357738	17361919	leucine-rich repeat receptor protein kinase EXS precursor,putative,expressed,cell,signal transduction,kinase activity,nucleotide binding,protein modification process
LOC_Os10g33440	down	2	17606602	17613157	NB-ARC domain containing protein,expressed,protein binding,response to stress
LOC_Os10g33490	down	14	17646143	17650622	expressed protein
LOC_Os10g33770	down	3	17858209	17872878	importin-beta N-terminal domain containing protein,expressed,binding
LOC_Os10g33790	down and up	1	17905866	17910800	expressed protein,plastid
LOC_Os10g33874	down	2	17980294	17985456	PPR repeat domain containing protein,putative,expressed,molecular_function,cellular_component,biological_process
LOC_Os10g33920	up	1	18011819	18018928	transporter-related,putative,expressed,membrane,Golgi apparatus
LOC_Os10g34020	up	1	18145792	18149595	glutathione S-transferase,putative,expressed,transferase activity,metabolic process,cellular process,catabolic process,secondary metabolic process,response to abiotic stimulus,response to endogenous stimulus,post-embryonic development,cytoplasm,plastid
LOC_Os10g34170	up	1	18231655	18236511	glutaredoxin domain containing protein,putative,expressed,catalytic activity,molecular_function,cellular_component,signal transduction,metabolic process,cellular homeostasis
LOC_Os10g34360	down	1	18316325	18318781	stilbene synthase,putative,expressed,biosynthetic process,cellular process,secondary metabolic process,metabolic process,transferase activity,catalytic activity,anatomical structure morphogenesis,cellular component organization,multicellular organismal development
LOC_Os10g34400	down	2	18343006	18352003	expressed protein,DNA binding,metabolic process,response to stress,membrane,thylakoid,nuclease activity
LOC_Os10g34790	up	1	18573539	18575856	terpene synthase,putative,expressed,catalytic activity,biosynthetic process,cellular process,lipid metabolic process
LOC_Os10g34920	down	1	18637489	18638521	secretory protein,putative,expressed,cell,response to stress
LOC_Os10g35000	up	1	18667175	18669332	G-patch domain containing protein,expressed,intracellular,biological_process,nucleic acid binding
LOC_Os10g35160	down	7	18769621	18773188	expressed protein
LOC_Os10g35170	up	2	18773359	18777132	semialdehyde dehydrogenase,NAD binding domain containing protein,putative,expressed,catalytic activity,membrane,metabolic process,cellular process,biological_process,nucleolus,protein binding,binding,plastid
LOC_Os10g35200	up	1	18798725	18806059	katanin p80 WD40 repeat-containing subunit B1 homolog 1,putative,expressed,intracellular,protein binding,nucleotide binding,biological_process
LOC_Os10g35230	down	5	18823675	18825328	Rf1,mitochondrial precursor,putative,expressed,mitochondrion,biological_process
LOC_Os10g35450	up	2	18970490	18975230	serine/threonine-protein kinase,putative,expressed,cellular_component,metabolic process,cellular process,kinase activity,nucleotide binding,protein modification process
LOC_Os10g35460	up	3	18976009	18979110	COBRA,putative,expressed,cellular component organization,cellular process,plasma membrane,membrane,cell,molecular_function,cell wall,cell growth,response to stress,response to abiotic stimulus
LOC_Os10g35580	up	1	19033885	19036321	ATEB1A-like microtubule associated protein,putative,expressed,nucleus,protein binding,cytoplasm,cell wall,nucleolus,cytoskeleton,response to abiotic stimulus,tropism,cellular component organization,cellular process
LOC_Os10g35720	down	2	19096820	19100605	OsGrx_S17 - glutaredoxin subgroup II,expressed,catalytic activity,molecular_function,metabolic process,cellular process,response to stress,response to abiotic stimulus,transport,cytosol,cell cycle
LOC_Os10g35780	down	1	19135425	19136479	expressed protein
LOC_Os10g35920	down	1	19190119	19194448	OsFBX389 - F-box domain containing protein,expressed,molecular_function,biological_process
LOC_Os10g36250	up	26	19374119	19379513	tetratricopeptide repeat,putative,expressed,cellular_component,biological_process,binding
LOC_Os10g36270	up	28	19389025	19396741	disease resistance RPP13-like protein 1,putative,expressed,nucleotide binding,response to stress
LOC_Os10g36410	down	1	19464064	19468255	expressed protein
LOC_Os10g36470	down	1	19512563	19516823	peptidase,M24 family protein,putative,expressed,protein modification process,metabolic process,hydrolase activity,protein metabolic process,cytosol,binding,cytoplasm
LOC_Os10g36690	up	1	19620006	19626243	dehydration response related protein,putative,expressed,biological_process
LOC_Os10g37210	up	1	19908434	19913891	FAD dependent oxidoreductase domain containing protein,expressed,catalytic activity,molecular_function,mitochondrion,metabolic process,cellular process,catabolic process,response to abiotic stimulus
LOC_Os10g37840	up	1	20257012	20261397	CCB2,putative,expressed,molecular_function,cellular component organization,cellular process,plastid
LOC_Os10g37950	down	1	20327370	20328547	conserved hypothetical protein
LOC_Os10g38060	up	2	20377031	20386085	phospholipase D,putative,expressed,hydrolase activity,biological_process,metabolic process,protein binding,cellular_component,lipid binding,response to stress,response to biotic stimulus
LOC_Os10g38140	up	4	20431775	20433265	glutathione S-transferase,putative,expressed,transferase activity,metabolic process,cellular process,catabolic process,secondary metabolic process,response to abiotic stimulus,response to endogenous stimulus,post-embryonic development,cytoplasm,plastid
LOC_Os10g38450	up	12	20537709	20540484	receptor-like protein kinase 2 precursor,putative,expressed,cell,signal transduction,kinase activity,nucleotide binding,protein modification process
LOC_Os10g38890	down	1	20719171	20722956	expressed protein
LOC_Os10g39010	down	1	20791019	20795883	TKL_IRAK_CrRLK1L-1.16 - The CrRLK1L-1 subfamily has homology to the CrRLK1L homolog,expressed,metabolic process,cellular process,kinase activity,nucleotide binding,cellular_component,protein modification process,plasma membrane,molecular_function,biological_process
LOC_Os10g39140	up	1	20886352	20892217	flavonol synthase/flavanone 3-hydroxylase,putative,expressed,cellular_component,response to biotic stimulus,biosynthetic process,cellular process,secondary metabolic process,catalytic activity,metabolic process
LOC_Os10g39220	down	1	20936559	20940489	tobamovirus multiplication protein,putative,expressed,reproduction
LOC_Os10g39230	up	3	20940762	20947963	tRNA-splicing endonuclease positive effector-related,putative,expressed
Note:
See Suppl. Table 1
